## RESEARCH ARTICLE

# The influence of plant odours on sexual readiness in an insectivorous songbird

Samuel P. Caro<sup>‡</sup>, Ségolène Delaitre, Bruno Buatois, Francesco Bonadonna and Jessica L. Graham\*

## ABSTRACT

Many organisms rely on environmental cues to predict and anticipate the annual optimal timing of reproduction. In insectivorous birds, preparation for breeding often coincides with the time vegetation starts to develop in spring. Whether there is a direct relationship between the two, and through which mechanisms this link could come about, has rarely been investigated. Plants release herbivore-induced plant volatiles (HIPVs) when they are attacked by insects, and recent studies have shown that birds can detect and orient to those odours when searching for food. Whether those volatiles also stimulate sexual reproductive development and timing of reproduction remains to be discovered. We tested this hypothesis by monitoring gonadal growth in pairs of blue tits (*Cyanistes caeruleus*) exposed to air from caterpillar-infested oak trees or from a control, in spring. We found that while males and females grew their gonads over time, gonads grew at the same rate in both odour treatments. More exploratory (i.e. a proxy of personality) females did, however, have larger ovarian follicle sizes when exposed to the HIPVs than to the control air, which is consistent with earlier results showing that fast explorers have larger gonads in spring and are more sensitive to HIPVs. If HIPVs constitute powerful attractants in foraging birds, their influence on gonadal development prior to breeding appears to be relatively subtle and to only enhance reproductive readiness in some individuals. These results are nevertheless important as they set olfaction as a new player in the seasonal timing of reproduction in birds.

**KEY WORDS:** Olfaction, Herbivore-induced plant volatiles, Seasonal timing, Reproduction, Gonadal cycles, Birds

## INTRODUCTION

Photoperiod (i.e. day length) is the predominant cue used by temperate breeding organisms to determine the appropriate time of year to undergo the physiological and behavioural changes to prepare for seasonal breeding (Dawson, 2003). However, photoperiod does not vary annually, which means that it is of no use for predicting year-to-year variation in environmental conditions. This is what supplementary, or non-photoc cues do (reviewed by Chmura et al., 2020). Temperature has received vast attention as a supplementary cue (Caro et al., 2013a) as rapidly occurring changes to the environment are shifting the timing of life history traits across a broad array of taxa (Parmesan, 2006). However, results from studies manipulating temperature and

observing effects on the timing of breeding have been mixed. If a causal relationship between ambient temperature and timing of reproduction has been shown in some songbirds (Meijer et al., 1999; Visser et al., 2009), the amplitude of this effect has proven variable and, in all cases, smaller than expected, particularly on the physiological mechanisms of reproduction (Caro et al., 2013b; Dawson, 2005; Perfito et al., 2005; Schaper et al., 2011a; Verhagen et al., 2020; Visser et al., 2009, 2011; Watts et al., 2018). This suggests that temperature is not the only player regulating annual variation in the seasonal timing of reproduction in temperate-zone species and it calls for investigations on other non-photoc signals.

Vegetation development, and more specifically the timing of bud burst in trees, has also received attention as a possible reproductive cue, particularly in insectivorous birds. Relying on bud development to decide when to start breeding could be a good proxy for predicting the optimal timing for breeding in several bird species because buds and young leaf shoots constitute the exclusive food of the caterpillars that these birds provide to their chicks (Du Merle and Mazet, 1983; Naef-Daenzer and Keller, 1999; van Asch et al., 2013). Many studies have indeed found significant correlations between tree phenology and laying date in wild populations of insectivorous birds (Bison et al., 2020; Bourgault et al., 2010; Cole et al., 2015; Hinks et al., 2015; Nilsson and Källander, 2006; Shutt et al., 2019; Slagsvold, 1976). However, bud burst is tightly linked with temperature and only a handful of studies have experimentally tested the effect of vegetation cues independently from temperature cues on bird reproduction (Schaper et al., 2011b; Visser et al., 2002; Voigt et al., 2007, 2011). To complicate things further, the effect of plants on seasonal timing could occur through various sensory channels, which include visual, gustatory, tactile and olfactory pathways (Ettinger and King, 1981; Voigt et al., 2011).

Plants have been shown to defend against herbivores by releasing volatile alarm signals (herbivore-induced plant volatiles, HIPVs) that attract predators. This ability to attract predators has been well studied in insects (Turlings and Benrey, 1998), where alarm signals emitted by plants in response to caterpillar grazing attract parasitoid wasps (Van Poecke et al., 2001), but also in seabirds that use degradation products of phytoplankton to identify fish-rich zones (Dell'Araccia et al., 2014; Savoca and Nevitt, 2014). It was shown that plants are capable of reducing the number of herbivores by greater than 90% through the release of such volatiles (Kessler and Baldwin, 2001). Recent evidence also revealed that songbirds are capable of detecting caterpillar infestation of apple trees completely by smell (Amo et al., 2013). However, there is very little knowledge concerning the effects of plant volatile emissions in contexts other than foraging. Carnivorous arthropods will invest more in reproduction when presented with olfactory cues from infested plants while undergoing a food shortage (Rondoni et al., 2017). We have also recently shown that birds with higher levels of testosterone, the main reproductive hormone in males, were more

CEFE, CNRS, Univ Montpellier, EPHE, IRD, 34293 Montpellier cedex 5, France.

\*Present address: Black Hills State University, School of Natural Sciences, Spearfish, SD 57799, USA.

<sup>‡</sup>Author for correspondence (samuel.caro@cefe.cnrs.fr)

 S.P.C., 0000-0002-5405-7753

attracted to areas diffusing HIPVs characteristic of a caterpillar infestation (Graham et al., 2021), and that more eggs and fledglings were produced in forest zones diffusing artificial HIPVs (S.D., J.L.G., B.B., C. de Franceschi, P. Giovannini, A. Lucas, F.B. and S.P.C., unpublished results). Whether and how these volatile emissions from infested plants directly influence the physiological mechanisms underlying reproduction is, however, still unknown.

The goal of this study was to determine whether insectivorous songbirds use HIPVs emitted by tree buds in response to initial caterpillar infestation in the spring as a cue to prepare for breeding. We exposed breeding pairs of blue tits (*Cyanistes caeruleus*) in captivity to the odours of caterpillar-infested trees or a control odour, over two consecutive years using a complex experimental setting in which we controlled the air that the birds breathed. While photoperiodic and temperature cues were identical to all breeding pairs, we only exposed birds to the tree odours so any potential visual, gustatory or tactile cues provided by vegetation would not be present (Amo et al., 2013). We monitored breeding pairs for gonadal development and hypothesized that pairs exposed to odours from caterpillar-infested trees would develop their gonads more quickly than pairs in the control group.

Gonadal development might differ not only between the experimental and the control groups but also among birds exposed to the odour treatment. Exploring variance among individuals is central to understanding ecological and evolutionary processes, and it has long been neglected by endocrinologists (Williams, 2008). One way individuals differ reliably is in their temperament or personality, which in songbirds is often measured through exploratory behaviours (Réale et al., 2007). Several of these behaviours have indeed been shown to be repeatable and heritable, and to covary with one another, such as exploration of new environments and new objects, and aggression (Dingemanse et al., 2002). Interestingly, these temperaments also covary with physiological traits and environmental perception (van Oers et al., 2011). In great tits, for example, ovarian follicle volumes differ between selection lines for personality, with fast-exploring females having larger ovarian follicles (Caro et al., 2019). We also recently showed that more exploratory male blue tits are more attracted to HIPVs than less exploratory males (S.D., J.L.G., B.B., C. de Franceschi, P. Giovannini, A. Lucas, F.B. and S.P.C., unpublished results). Exploration behaviour thus seems to be linked to both HIPV sensitivity and reproductive mechanisms in tits, and therefore constitutes a potential source of variation in how individuals integrate and respond to HIPV signals.

## MATERIALS AND METHODS

### Ethical note

Blue tits, *Cyanistes caeruleus* (Linnaeus 1758), were trapped and maintained under licences 2018-s-11 issued by the Direction Régionale de l'Environnement, de l'Aménagement et du Logement Languedoc-Rousillon; and 15-XIX-116 issued by the Direction Départementale de la Protection des Populations de l'Hérault. These experiments were carried out under licence D34-172-11 from the Direction Départementale de la Protection des Populations de l'Hérault, and approved by the animal experimentation ethical committee of the French Ministry of Higher Education and Research (APAFIS#8608-2017012011062214 v4).

### Animal housing

The experiment took place over two years at the CNRS in Montpellier, France (43°37'56"N, 3°52'E). Twenty-four hand-raised blue tits (born in 2015 in our long-term studied population of La Rouvière, near

Montpellier; Caro et al., 2021) were housed in 12 terrariums (120×50×50 cm, one opposite-sex pair per terrarium) on 20 February 2019 and 21 February 2020 to allow approximately 1 month to adjust to new housing before starting the experiment ( $n=48$  birds total). We randomly assigned 12 male–female pairs each year to either a HIPV exposure treatment ( $n=6$  per year) or control ( $n=6$  per year). Within each terrarium, a wire mesh was used to separate males and females (see Fig. 1), because males are usually ready to reproduce before females (Caro et al., 2006, 2009) and can therefore become overly aggressive toward females in confined environments (Caro et al., 2007). While physical contact was prevented, males and females could still interact visually and acoustically, which has been shown to be sufficient for birds to develop their gonads and often for laying eggs (Kroodsmma, 1976). Every individual had access to a nest box (not shown on Fig. 1) that was built around the wire mesh, with one entrance hole on each side, such that males and females could also see each other inside the nest box. *Ad libitum* food and water were replaced 3 times per week.

Terrariums were housed indoors to remove any potential visual cues provided by vegetation. We housed the birds in three different rooms with four breeding pairs per room. Pairs were visually isolated from other pairs and the terrariums also strongly reduced the ability of the pairs in the same room to hear each other. One terrarium in each room received air flow from one of four outdoor enclosures, so that each room had two treatment and two control terrariums. A window allowed natural light into the room. We additionally supplemented artificial light starting 15 min post-sunrise, until 15 min pre-sunset, so that birds were exposed to the natural increase and decrease in light intensity from the relatively small window (55×42 cm) (Fleissner and Fleissner, 2002). Extra light aimed at increasing and homogenizing light intensity in the room during the day. Sunrise and sunset times were determined using the United States Naval Observatory database ([www.usno.navy.mil/USNO](http://www.usno.navy.mil/USNO)).

### Equipment design

To control the odour cues that individuals received, two pumps (KNF Neuberger, cat. no. N026.1.2AN.18) pushed 40 l min<sup>-1</sup> of air through a respective charcoal filter to purify the air (Doughty et al., 1998) (Fig. 1). Flow from each pump was then split to push air into one control and one experimental enclosure. The four enclosures were constructed of stainless steel structures (250×80×80 cm) covered with thermowelded, chemically resistant Flonfilm 300 ETFE film (100 µm thick, PolyFlon Technology, LTD, cat. no. ETFE1000/1550). Acrylic flow meters (Dakota Instruments Inc., cat. no. 6A0111BV-AB) kept the flow to ~19 l min<sup>-1</sup> in each enclosure. Three smaller pumps (KNF Neuberger, cat. no. N86KN.18) then each pulled air from one enclosure and pumped it through an acrylic flow meter at 5 l min<sup>-1</sup> (Dakota Instruments Inc., cat. no. 6A0107BV-AB) and into the terrarium (Fig. 1). An overflow of ~4 l min<sup>-1</sup> in the enclosures ensured outward pressure of the system in case any leaks were present, so unfiltered air was less likely to enter the system. Air passively exited the terrariums through two exhaust tubes that led outside.

Air could also be diverted through a centre enclosure (made of glass in 2019, aluminium in 2020) shared by all 12 terrariums (no. 9 on Fig. 1). When trees needed to be watered or replaced, birds continued to receive filtered, uncontaminated air while the treatment and control enclosures were open. A third pump (not shown on Fig. 1) was used to flush contaminated air out of the enclosures for several hours before resuming airflow from the enclosures. Because of high humidity levels inside the terrariums in 2019, particularly later in the season, several changes were made to the system in 2020 (Fig. S1). First, the

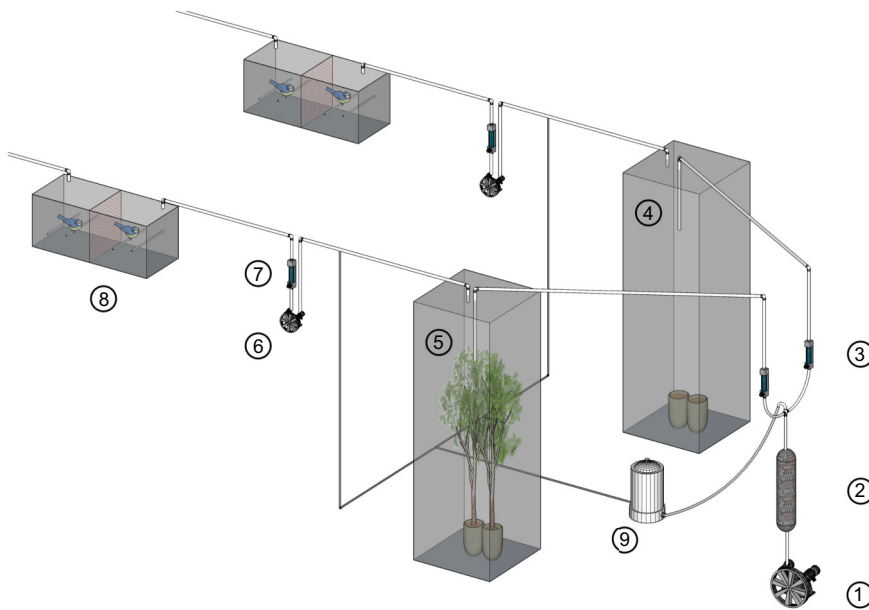

**Fig. 1. Diagram of the experimental setup.** Air was pumped (1) and pushed through a charcoal filter (2). Purified air was then split and flow regulated at  $19 \text{ l min}^{-1}$  (3) before reaching one control (4) and one experimental (5) enclosure. Smaller pumps (6) pulled air from the enclosures at  $5 \text{ l min}^{-1}$  (7) and to the terrariums (8). Silica gel (9) was used to remove moisture from the air when flow was not through the enclosures. For simplicity, the diagram represents only a fraction of the experimental setup. In reality, there were four enclosures, each leading to three terrariums (12 in total). See Fig. S1 for a more detailed view.

tubing leading from the small pumps to the terrariums was run through a cooling system to remove water. The condensed water vapour was collected in glass jars below the cooling system before the air entered the terrarium. These jars were emptied at least once per week. Second, the centre enclosure described above was filled with silica gel. Twice a week at the time trees in the other enclosures were manipulated, air was diverted through this silica gel for approximately 24 h to dry air in the terrariums (Yu et al., 2001).

### Infestation of trees

Green oak tortrix moths (*Tortrix viridana*) were collected from Corsica in June 2018 and 2019 and placed in large nets on oak branches to lay eggs. Branches were returned to Montpellier and kept outside at ambient temperature to synchronize the hatching of eggs with oak bud burst. Green oak tortrix caterpillars are oak specialists and hatching needs to be closely timed with the elongation and development of oak buds so caterpillars can perforate the bud and eat young developing leaves inside the bud (Du Merle, 1999; Ivashov et al., 2002). Thus, we utilized downy oak trees (*Quercus pubescens*) of approximately 2.5 m height, grown in pots. To spread out the timing of bud burst over the season, we housed 20 trees on the south side of a building, 20 trees on the north side, and 40 trees at higher elevation to delay bud burst. We began to expose birds to HIPV air as soon as bud burst and caterpillar hatching occurred simultaneously.

When bud development began to reach an appropriate stage for caterpillar infestation, four trees were placed into each of the two treatment enclosures and infested with freshly hatched green oak tortrix caterpillars (approximately 20 caterpillars per tree, depending on caterpillar availability). Control enclosures contained four soil-filled pots identical to those the trees were planted in. All pots (including those with trees) were wrapped in ETFE film bags to reduce any odours emitted from the soil and pots from entering the terrariums. When buds on the tree began turning into mature leaves, the trees were replaced with newly infested trees (generally 1–2 times per week). We used freshly hatched caterpillars on new trees until ~29 April 2019, when nearly all caterpillar eggs had hatched. We then began to transfer caterpillars from trees that were being removed to those that were being added. This probably kept the HIPV production at a very

early season stage for most of the experiment. We stopped changing trees and let them progress in the enclosures after the third laparotomy (details below). However, in 2020, the lockdown in France caused by the COVID-19 pandemic made it impossible to transport the high elevation trees to the campus. Thus, when we ran out of trees (21 April 2020), trees and caterpillars were left to continue development. HIPVs emitted by buds are to our knowledge similar to those emitted by developed leaves, although the emission rates seem lower in buds than in leaves (J.L.G., M. Staudt, B.B. and S.P.C., unpublished results).

Control enclosures were treated exactly the same as treatment enclosures. When treatment enclosures were opened to water the trees, control enclosures were also opened and water added to the soil-filled pots. Similarly, when two old trees were exchanged for two new ones, two soil filled pots were likewise replaced with two new soil filled pots.

Even though this was beyond the scope of the present study, a small number of air samples reaching the terrariums were pulled into cartridges containing an adsorbent to collect volatile compounds. These compounds were subsequently separated over a gas chromatograph–mass spectrometer coupled system (GC-MS) using a semi-standard non-polar column. Mass spectrum and linear retention index comparison enabled us to identify the compounds present. Those samples revealed that (*E*)- $\beta$ -ocimene, (*E*)-4,8-dimethyl nona-1,3,7-triene (DMNT), methyl salicylate, (*E*)-caryophyllene, aromadendrene,  $\alpha$ -humulene and (*E,E*)- $\alpha$ -farnesene, all known HIPVs (Röse and Tumlinson, 2004; J.L.G., M. Staudt, B.B. and S.P.C., unpublished data), were found in the terrariums of the HIPV treatment group (Fig. 2).

### Reproductive measures

Three laparotomies were conducted each year to measure gonadal growth in all birds. Initial laparotomies were conducted when the photoperiod was 11 h:13 h light:dark to obtain a pre-breeding measure of the gonads and confirm the two treatment groups did not differ. Two subsequent laparotomies were performed at 4 week intervals (12.5 h:11.5 h and 14 h:10 h light:dark photoperiods). Individuals were unilaterally laparotomized under isoflurane anaesthesia. Left testis length and width were recorded in males

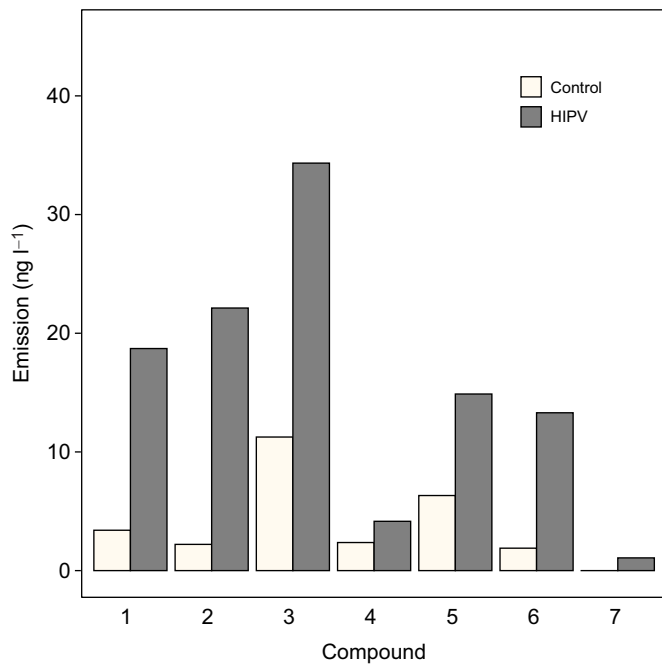

**Fig. 2. Concentrations of the compounds detected in the terrariums.**

Concentrations depicted here are the means of the 6 aquariums exposed to either air from caterpillar-infested trees (HIPV group) or to control air (Control group). (1) (*E*)- $\beta$ -Ocimene, (2) DMNT, (3) methyl salicylate, (4) (*E*)-caryophyllene, (5) aromadendrene, (6)  $\alpha$ -humulene, (7) (*E,E*)- $\alpha$ -farnesene.

and the diameter of the largest developing ovarian follicle was measured in females. Measures were collected using the scale engraved in the ocular of a binocular microscope (Optika SZM-4) to the nearest 0.1 mm. Testis volume was calculated as:  $V=4/3\pi\alpha^2\beta$  where  $\alpha$  is half the testis width and  $\beta$  is half the testis length. Follicle volume was calculated as:  $V=4/3\pi\alpha^3$  where  $\alpha$  is half the follicle width (Visser et al., 2011). The observer was blind to the treatments. Throughout the experiment, birds were provided with moss to build nests and monitored for possible nest building and egg laying.

### Exploration scores

We scored exploration by releasing each bird separately in a novel environment, which here consisted of an artificially lit room (3.5 $\times$ 2 m) equipped with five two-storey perches. Once the bird entered the room, its movements were observed for 2 min. The total number of movements between the five perches was counted, as well as hops up, and down, and based on these measures, birds were given an exploration score on a continuous scale with higher scores indicating faster exploration, and lower scores indicating slower exploration (Dingemanse et al., 2002; Reparaz et al., 2014).

### Statistical analysis

All analyses were performed with R version 4.1.0. Linear mixed-effects models (LMM) were completed using the lme4 and lmerTest packages (Bates et al., 2015; Kuznetsova et al., 2017). We set  $\alpha=0.05$ .

We started by running some preliminary analyses on the possible influence of variables that were not of primary interest to our study. Using two mixed-effect models (one for each sex), we tested whether the tree enclosures (four in total), the rooms housing the terrariums (three in total), the spatial position of the terrariums within a room (up or down the shelves, near or far from the window

providing sunlight), the year and the body mass of the birds had any influence on gonadal size. We only found a significant influence of body mass on gonadal size in females; none of the other variables had any significant effect on gonadal size (all  $P>0.1$ , data not shown). We therefore decided to keep body mass in subsequent analyses, and ignored the other variables.

Male and female gonad size was analysed separately as volume is not comparable between the sexes. In 2019, 24 individuals were measured during the first ( $T_0$ ) and second ( $T_1$ ) time point. There were only 22 measures for the third time point ( $T_2$ ) as we could not locate the ovary in one control female and one treatment male died during the experiment. Additionally, one female in 2019 laid an egg before the third laparotomy. As the female was laying, we did not operate on it and instead assigned the mean yolk diameter calculated from 23 unfertilized blue tit eggs collected from our aviaries (mean  $\pm$ s.e.m. 8.24 $\pm$ 0.12 mm) as a proxy for its largest ovarian follicle diameter. In 2020, 24 individuals were measured at  $T_0$  and  $T_1$ . Twenty-three individuals were measured at  $T_2$  because one treatment male died during the experiment.

Gonadal volume was log-transformed before analysis to account for exponential growth. LMM included treatment (factorial), time point (continuous), exploration score (continuous), body mass (continuous), treatment by exploration score interaction, and treatment by time point interaction as fixed factors. Individual ID was included as a random intercept to account for repeated measures. Non-significant interactions were removed from the models. As the HIPV treatment was only provided after  $T_0$ , we also ran the analyses described above, restricting data to  $T_1$  and  $T_2$ . The results were very similar to those obtained with all three time points (data not shown). Not enough individuals built nests (7 out of 24: 3 in the HIPV group, 4 in the control group) or laid eggs (6 out of 24: 3 in each group); thus, no statistical analyses were performed on breeding data.

## RESULTS

Ovarian follicle size increased over the course of the experiment ( $P<0.001$ ; Table 1, Fig. 3), but follicles grew at the same rate in HIPV and control treatments (interaction treatment $\times$ time:  $P=0.505$ ; Table 1, Fig. 3). There was a significant interaction between odour treatment and exploration score, with fast-exploring females having

**Table 1. Analysis of the variables that potentially influence the volume of the gonads of female ( $n=24$ ) and male ( $n=24$ ) blue tits**

| Variable                             | Estimate | s.e. | F      | P                |
|--------------------------------------|----------|------|--------|------------------|
| <b>Females</b>                       |          |      |        |                  |
| (Intercept)                          | -0.26    | 0.12 |        |                  |
| Treatment                            | -0.37    | 0.17 | 4.98   | <b>0.038</b>     |
| Time                                 | 0.41     | 0.07 | 36.83  | <b>&lt;0.001</b> |
| Exploration score                    | -0.01    | 0.04 | 3.68   | 0.070            |
| Body mass                            | 0.23     | 0.05 | 18.73  | <b>&lt;0.001</b> |
| Treatment $\times$ Exploration score | 0.10     | 0.05 | 5.04   | <b>0.037</b>     |
| Treatment $\times$ Time              | -0.09    | 0.13 | 0.45   | 0.505            |
| <b>Males</b>                         |          |      |        |                  |
| (Intercept)                          | 1.07     | 0.07 |        |                  |
| Treatment                            | -0.08    | 0.08 | 0.88   | 0.362            |
| Time                                 | 0.46     | 0.04 | 165.31 | <b>&lt;0.001</b> |
| Exploration score                    | -5e-04   | 0.01 | 0.01   | 0.914            |
| Body mass                            | 0.06     | 0.04 | 2.68   | 0.113            |
| Treatment $\times$ Time              | 0.09     | 0.07 | 1.45   | 0.236            |
| Treatment $\times$ Exploration score | 0.01     | 0.01 | 0.35   | 0.562            |

Volumes were log-transformed. Eliminated interactions (in italics) are presented in the reverse order in which they were removed from the model. Intercept includes Treatment=control. Bold indicates significance.

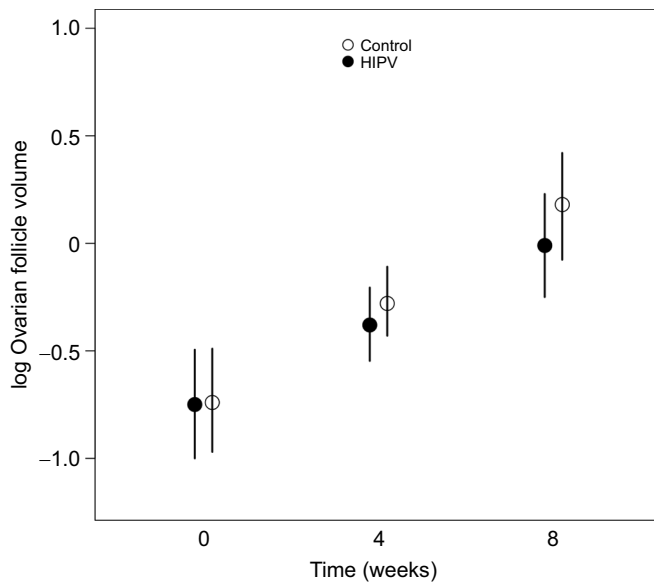

**Fig. 3. Ovarian follicle growth in blue tits.** While there was a significant increase in follicle volume over time (LMM,  $F=36.83$ ,  $P<0.001$ ), they grew at the same rate in the control and HIPV treatments (LMM,  $F=0.45$ ,  $P=0.505$ ). Data are means $\pm$ s.e.m.;  $n=24$ , 12 birds per treatment.

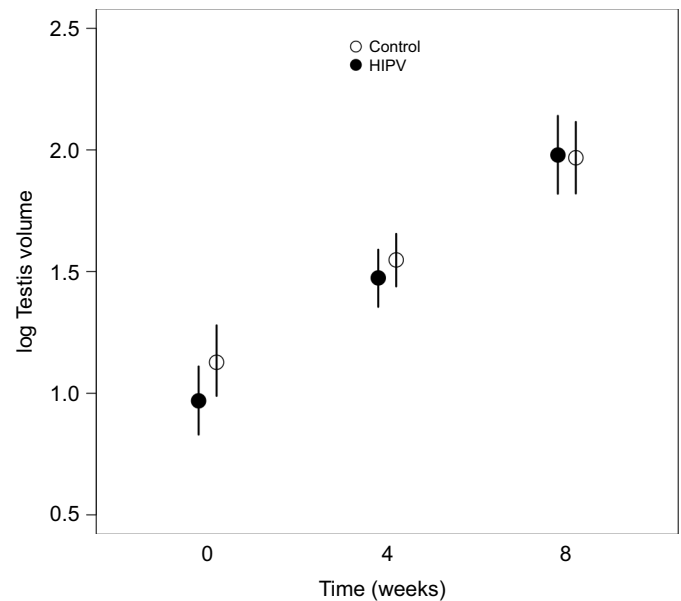

**Fig. 5. Testis growth in blue tits.** While there was a significant increase in testis volume over time (LMM,  $F=165.31$ ,  $P<0.001$ ), testes grew at the same rate in the two treatments (LMM,  $F=1.45$ ,  $P=0.236$ ). Data are means $\pm$ s.e.m.;  $n=24$ , 12 birds per treatment.

larger ovarian follicles when exposed to HIPVs than to the control odour treatment (interaction treatment $\times$ exploration score:  $P=0.037$ ; Table 1, Fig. 4). Finally, heavier females had larger ovarian follicles ( $P<0.001$ ; Table 1).

Testes also increased in volume over time ( $P<0.001$ ; Table 1, Fig. 5). As for female gonads, male gonads grew at the same rate in HIPV and control treatments (interaction treatment $\times$ time:  $P=0.236$ ; Table 1, Fig. 5). Body mass and exploration score did not influence testis volume (all  $P\geq 0.1$ ; see Table 1).

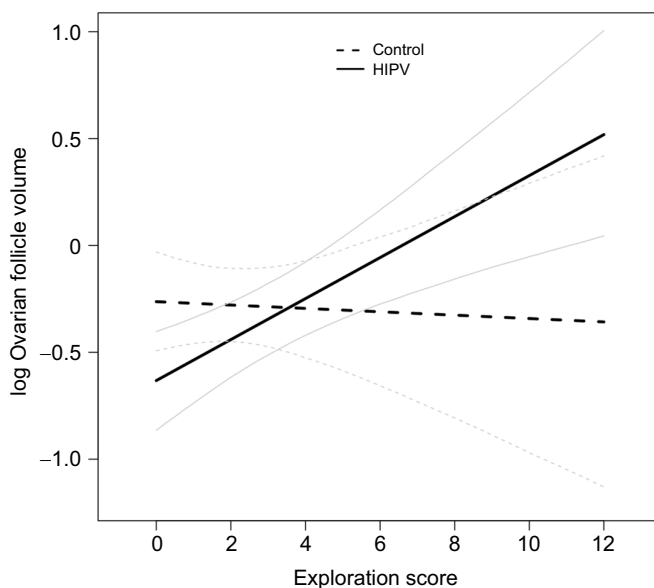

**Fig. 4. Effect of odour treatment and personality on ovarian follicle volume in female blue tits.** Fast explorers had larger ovarian follicles when exposed to air containing HIPVs than when exposed to control air (LMM,  $F=5.04$ ,  $P=0.037$ ). Lines depict model estimates (black) and 95% confidence intervals (grey);  $n=24$ , 12 birds per treatment.

## DISCUSSION

Our results suggest that HIPVs produced in response to caterpillar infestation do not exert a strong influence on pre-breeding sexual development in blue tits. While gonad volume increased over time in both males and females, there were no striking differences in size between the control and the treatment pairs. A significant response to the odour treatment was nevertheless visible in more exploratory females, which had larger ovarian follicles in the HIPV than in the control group.

Experiments manipulating non-photoc cues related to the initiation of reproduction in strictly seasonal breeding birds rarely result in striking differences between groups, owing to the fact that those cues are fine-tuning cues that only modulate the powerful effect of photoperiod (Wingfield and Kenagy, 1991). The case study of the influence of temperature cues on reproduction in great tits, highlighted in the Introduction, is probably the best example (Schaper et al., 2011a; Visser et al., 2009). Experimental evidence for an effect of temperature on great tit timing of reproduction in an ecologically relevant context required nearly 10 years of experiments in captivity. Furthermore, temperature was never found to influence some of the main physiological mechanisms underlying egg laying, which include gonadal size, luteinizing hormone and prolactin concentration (reviewed in Caro et al., 2013b). Only patterns of gene expression related to seasonal timing were found to differ between temperature treatments (Laine et al., 2019), suggesting that the substrate for temperature-induced changes in reproductive physiology is there, but is hard to detect. It is possible that the same complexity applies to environmental cues linking vegetation to the timing of breeding, as suggested here by the absence of an effect of HIPVs on gonadal development, except for a subset of females (see below). Only a few previous studies have manipulated vegetation cues in captivity in tits (mainly through the addition of cut branches to the aviaries where the birds were held), and they found no effect on the timing of reproduction, or at least not in the predicted direction (Schaper et al., 2011b; Visser et al., 2002). In both cases, however, there was evidence for a positive effect of the leafing branches on luteinizing hormone, a

central reproductive hormone, which called for more investigation on the topic. Other studies on other bird and mammal species sometimes found stronger evidence. In meadow voles (*Microtus montanus*), adding sprouted wheatgrass, or one of its constituents (6-methoxybenzoazolinone), triggered reproduction and modulated sex ratio (Berger et al., 1987; Negus and Berger, 1977), while in white-crowned sparrows (*Zonotrichia leucophrys*), adding wheat sprout leaves to the diet accelerated ovarian development (Ettinger and King, 1981). In canaries (*Serinus canaria*), the presence of vegetation in the aviaries advanced egg laying by several weeks (Voigt et al., 2007, 2011). While the number of experimental studies on the possible influence of vegetation development on bird reproduction is very limited, the sensory pathways through which the plant stimuli were provided varied tremendously and included in various proportions tactile, gustatory, olfactory and visual signals. The drawback is that in several of those earlier studies, animals from the experimental groups could physically interact with the plants, while the control animals received none, which introduces environmental enrichment as a confounding factor. Disentangling pathways by carefully controlling sensory modes of perception of plants, as Voigt et al. (2011) did, for example, will be key to clarifying whether and how vegetation cues potentially affect reproduction in vertebrates. In our case, the only possible sensory mode of perception of infested oak trees was olfaction, and we show that more exploratory females responded to these HIPVs. Future studies will need to determine whether combining olfactory with other carefully selected cues (either visual or gustatory cues from plants, or other environmental cues such as photoperiod or temperature) could enhance the results obtained here.

More exploratory females grew their ovarian follicles more rapidly when exposed to HIPVs. This is not the first time that a link between a behaviour related to personality and HIPVs has been discovered. In a recent study testing whether blue tits can innately detect and orient to a blend of artificial HIPVs mimicking an infestation of oak buds by caterpillars, we found that the preference for the side of a Y-maze containing the HIPVs was driven by fast exploratory males (S.D., J.L.G., B.B., C. de Franceschi, P. Giovannini, A. Lucas, F.B., S.P.C., unpublished results). The results of both experiments suggest that fast explorers might be more sensitive to HIPVs. Through which mechanisms this link operates is still unclear at present, but we know that high sensitivity to HIPVs in male blue tits is associated with testosterone (Graham et al., 2021). We also know that testosterone is locally produced in the olfactory epithelium in rats (Horie et al., 2017; Lupo et al., 1986), providing a possible mechanistic link between sex steroids and olfactory sensitivity for HIPVs. In female great tits, we have recently shown relationships between exploration behaviour, ovarian follicle size and plasma concentration of 17 $\beta$ -estradiol, the main sexual steroid in females. Females from a line artificially selected for fast exploration more rapidly increased 17 $\beta$ -estradiol after a gonadotropin-releasing hormone (GnRH) challenge, and had larger ovarian follicles than females from the line selected for slow exploration (Caro et al., 2019). This interplay between sex steroid hormones, HIPV sensitivity and personality clearly needs further investigation, in particular to understand whether the enhanced olfactory sensitivity of fast explorers is driven through the action of steroid hormones.

There may also be technical limitations that could explain why we did not find stronger differences between the treatment and control groups. First, birds were housed in relatively small compartments and blue tits are known to require large enclosures to reproduce (Caro et al., 2007). Not enough birds may have approached reproductive readiness to detect an effect of HIPVs, given the small

sample sizes. Some females, however, laid eggs (6 out of 24, see Materials and Methods), but we will need to experiment in larger settings to test this properly. A second potential issue is that HIPVs might not have reached the terrariums in sufficient concentrations. That early in the season, the HIPV production in response to caterpillar herbivory is very low (J.L.G., M. Staudt, B.B. and S.P.C., unpublished data). With overflow in the enclosures used to keep contaminated air from entering through any leaks in the system, we may have further lowered the concentration of HIPVs. Additionally, water condensation in the system due to high humidity levels can lead to adsorption on solid surfaces and oxidation of some volatile organic compounds (VOCs), particularly polar compounds, before they reach the bird enclosures (Niinemets et al., 2011). Despite this, however, we still detected several HIPV compounds in the air arriving to the terrariums (Fig. 2), showing that air to which birds were exposed in the treatment group included oak bud HIPVs.

In conclusion, our results do not provide strong evidence that HIPVs released by developing tree buds in response to caterpillar herbivory trigger gonadal recrudescence in captive blue tits. However, this might not be surprising given that vegetation cues, in the same way as temperature or rainfall, are considered supplementary cues that refine the preponderant influence of photoperiod in temperate zones. Our finding that more exploratory females had slightly larger gonads when exposed to HIPVs should be considered as a promising insight and it calls for more investigation on the possibility that olfaction could be a newly identified player in the seasonal timing of reproduction in birds.

#### Acknowledgements

The authors would like to thank D. Gomis and many other members of the Lunaret zoo in Montpellier, and many students at the CEFE, for hand-raising the birds used in this experiment; A. Hoste for DNA sexing and personality testing the birds; D. Degueldre for building the tree enclosures and terrariums; I. Vlandis for assistance with the experiment in 2019; M. Staudt for discussions about the design of the experiment; C. de Franceschi for collecting tortrix moths and pupae in Corsica; and two anonymous reviewers for their constructive comments on an earlier version of the manuscript. Volatile organic compound analysis was carried out using the technical facilities of the Platform of Chemical Analysis in Ecology (PACE – CEFE, Montpellier, France), with the support of LabEx CeMEB, an ANR 'Investissements d'avenir' programme (ANR-10-LABX-04-01).

#### Competing interests

The authors declare no competing or financial interests.

#### Author contributions

Conceptualization: S.P.C., F.B., J.L.G.; Methodology: S.P.C., B.B., F.B., J.L.G.; Validation: S.P.C., J.L.G.; Formal analysis: S.P.C., S.D., B.B., J.L.G.; Writing - original draft: S.P.C., J.L.G.; Writing - review & editing: S.P.C., S.D., B.B., F.B.; Visualization: S.P.C., S.D., J.L.G.; Supervision: S.P.C.; Project administration: S.P.C.; Funding acquisition: S.P.C.

#### Funding

This work was supported by a grant from the Agence Nationale de la Recherche (ANR-15-CE02-0005 to S.P.C.) and a PRESTIGE Postdoctoral Research Fellowship (PRESTIGE-2018-2-0007 to J.L.G.).

#### Data availability

All relevant data can be found within the article and its supplementary information.

#### References

- Amo, L., Jansen, J. J., van Dam, N. M., Dicke, M. and Visser, M. E. (2013). Birds exploit herbivore-induced plant volatiles to locate herbivorous prey. *Ecol. Lett.* **16**, 1348–1355. doi:10.1111/ele.12177
- Bates, D., Mächler, M., Bolker, B. and Walker, S. (2015). Fitting linear mixed-effects models using lme4. *J. Stat. Softw.* **67**, 1–48. doi:10.18637/jss.v067.i01
- Berger, P. J., Negus, N. C. and Rowsemitt, C. N. (1987). Effect of 6-methoxybenzoazolinone on sex ratio and breeding performance in *Microtus montanus*. *Biol. Reprod.* **36**, 255–260. doi:10.1095/biolreprod36.2.255

- Bison, M., Yoccoz, N. G., Carlson, B., Klein, G., Laigle, I., Van Reeth, C., Asse, D. and Delestrade, A. (2020). Best environmental predictors of breeding phenology differ with elevation in a common woodland bird species. *Ecol. Evol.* **10**, 10219–10229. doi:10.1002/ece3.6684
- Bourgault, P., Thomas, D., Perret, P. and Blondel, J. (2010). Spring vegetation phenology is a robust predictor of breeding date across broad landscapes: a multi-site approach using the Corsican blue tit (*Cyanistes caeruleus*). *Oecologia* **162**, 885–892. doi:10.1007/s00442-009-1545-0
- Caro, S. P., Lambrechts, M. M., Chastel, O., Sharp, P. J., Thomas, D. W. and Balthazart, J. (2006). Simultaneous pituitary-gonadal recrudescence in two Corsican populations of male blue tits with asynchronous breeding dates. *Horm. Behav.* **50**, 347–360. doi:10.1016/j.yhbeh.2006.03.001
- Caro, S. P., Lambrechts, M. M., Balthazart, J. and Perret, P. (2007). Non-photoperiodic factors and timing of breeding in blue tits: Impact of environmental and social influences in semi-natural conditions. *Behav. Process.* **75**, 1–7. doi:10.1016/j.beproc.2007.02.011
- Caro, S. P., Charmantier, A., Lambrechts, M. M., Blondel, J., Balthazart, J. and Williams, T. D. (2009). Local adaptation of timing of reproduction: females are in the driver's seat. *Funct. Ecol.* **23**, 172–179. doi:10.1111/j.1365-2435.2008.01486.x
- Caro, S. P., Schaper, S. V., Hut, R. A., Ball, G. F. and Visser, M. E. (2013a). The case of the missing mechanism: how does temperature influence seasonal timing in endotherms? *PLoS Biol.* **11**, e1001517. doi:10.1371/journal.pbio.1001517
- Caro, S. P., Schaper, S. V., Dawson, A., Sharp, P. J., Gienapp, P. and Visser, M. E. (2013b). Is microevolution the only emergency exit in a warming world? Temperature influences egg laying but not its underlying mechanisms in great tits. *Gen. Comp. Endocrinol.* **190**, 164–169. doi:10.1016/j.ygcen.2013.02.025
- Caro, S. P., Cornil, C. A., van Oers, K. and Visser, M. E. (2019). Personality and gonadal development as sources of individual variation in response to GnRH challenge in female great tits. *Proc. R. Soc. B Biol. Sci.* **286**, 20190142. doi:10.1098/rspb.2019.0142
- Caro, S. P., Pierre, L., Bergès, M., Bakker, R., Doutrelant, C. and Bonadonna, F. (2021). Mutual mate preferences and assortative mating in relation to a carotenoid-based color trait in blue tits. *Behav. Ecol.* **32**, 1171–1182. doi:10.1093/beheco/abab080
- Chmura, H. E., Wingfield, J. C. and Hahn, T. P. (2020). Non-photoc environmental cues and avian reproduction in an era of global change. *J. Avian Biol.* **51**, e02243. doi:10.1111/jav.02243
- Cole, E. F., Long, P. R., Zelazowski, P., Szulkin, M. and Sheldon, B. C. (2015). Predicting bird phenology from space: satellite-derived vegetation green-up signal uncovers spatial variation in phenological synchrony between birds and their environment. *Ecol. Evol.* **5**, 5057–5074. doi:10.1002/ece3.1745
- Dawson, A. (2003). Photoperiodic control of the annual cycle in birds and comparison with mammals. *Ardea* **90**, 355–367.
- Dawson, A. (2005). The effect of temperature on photoperiodically regulated gonadal maturation, regression and moult in starlings – potential consequences of climate change. *Funct. Ecol.* **19**, 995–1000. doi:10.1111/j.1365-2435.2005.01061.x
- Dell'Arciccia, G., Célérier, A., Gabirot, M., Palmas, P., Massa, B. and Bonadonna, F. (2014). Olfactory foraging in temperate waters: sensitivity to dimethylsulphide of shearwaters in the Atlantic Ocean and Mediterranean Sea. *J. Exp. Biol.* **217**, 1701–1709. doi:10.1242/jeb.097931
- Dingemanse, N. J., Both, C., Drent, P. J., Van Oers, K. and Van Noordwijk, A. J. (2002). Repeatability and heritability of exploratory behaviour in great tits from the wild. *Anim. Behav.* **64**, 929–938. doi:10.1006/anbe.2002.2006
- Doughty, D. T., Hayden, R. A., Cobes, J. W., III and Matviya, T. M. (1998). Purification of air in enclosed spaces. U.S. patent number 5,733,515. <https://uspto.report/patent/grant/5,733,515>
- Du Merle, P. (1999). Egg development and diapause: ecophysiological and genetic basis of phenological polymorphism and adaptation to varied hosts in the green oak tortrix, *Tortrix viridana* L. (Lepidoptera: Tortricidae). *J. Insect Physiol.* **45**, 599–611. doi:10.1016/S0022-1910(99)00045-1
- Du Merle, P. and Mazet, R. (1983). Stades phénologiques et infestation par *Tortrix viridana* L. (Lep., Tortricidae) des bourgeons du chêne pubescent et du chêne vert. *Acta Oecologica* **4**, 47–53.
- Ettinger, A. O. and King, J. R. (1981). Consumption of green wheat enhances photostimulated ovarian growth in white-crowned sparrows. *Auk* **98**, 832–834.
- Fleissner, G. and Fleissner, G. (2002). Perception of natural zeitgeber signals. In *Biological Rhythms* (ed. V. Kumar), pp. 83–93. Springer.
- Graham, J. L., Charlier, T. D., Bonadonna, F. and Caro, S. P. (2021). Olfactory detection of trace amounts of plant volatiles is correlated with testosterone in a passerine bird. *Horm. Behav.* **136**, 105045. doi:10.1016/j.yhbeh.2021.105045
- Hinks, A. E., Cole, E. F., Daniels, K. J., Wilkin, T. A., Nakagawa, S. and Sheldon, B. C. (2015). Scale-dependent phenological synchrony between songbirds and their caterpillar food source. *Am. Nat.* **186**, 84–97. doi:10.1086/681572
- Horie, S., Yamaki, A. and Takami, S. (2017). Presence of sex steroid-metabolizing enzymes in the olfactory mucosa of rats. *Anatomical Record Adv. Integr. Anat. Evol. Biol.* **300**, 402–414. doi:10.1002/ar.23497
- Ivashov, A. V., Boyko, G. E. and Simchuk, A. P. (2002). The role of host plant phenology in the development of the oak leafroller moth, *Tortrix viridana* L. (Lepidoptera: Tortricidae). *For. Ecol. Manag.* **157**, 7–14. doi:10.1016/S0378-1127(00)00652-6
- Kessler, A. and Baldwin, I. T. (2001). Defensive function of herbivore-induced plant volatile emissions in nature. *Science* **291**, 2141–2144. doi:10.1126/science.291.5511.2141
- Kroodtsma, D. E. (1976). Reproductive development in a female songbird: differential stimulation by quality of male song. *Science* **192**, 574–575. doi:10.1126/science.192.4239.574
- Kuznetsova, A., Brockhoff, P. B. and Christensen, R. H. B. (2017). lmerTest package: tests in linear mixed effects models. *J. Stat. Softw.* **82**, 1–26. doi:10.18637/jss.v082.i13
- Laine, V. N., Verhagen, I., Mateman, A. C., Pijl, A., Williams, T. D., Gienapp, P., van Oers, K. and Visser, M. E. (2019). Exploration of tissue-specific gene expression patterns underlying timing of breeding in contrasting temperature environments in a song bird. *BMC Genomics* **20**, 693. doi:10.1186/s12864-019-6043-0
- Lupo, C., Lodi, L., Canonaco, M., Valenti, A. and Dessi-Fulgheri, F. (1986). Testosterone metabolism in the olfactory epithelium of intact and castrated male rats. *Neurosci. Lett.* **69**, 259–262. doi:10.1016/0304-3940(86)90490-8
- Meijer, T., Nienaber, U., Langer, U. and Trillmich, F. (1999). Temperature and timing of egg-laying of European starlings. *Condor* **101**, 124–132. doi:10.2307/1370453
- Naef-Daenzer, B. and Keller, L. F. (1999). The foraging performance of great and blue tits (*Parus major* and *P. caeruleus*) in relation to caterpillar development, and its consequences for nestling growth and fledging weight. *J. Anim. Ecol.* **68**, 708–718. doi:10.1046/j.1365-2656.1999.00318.x
- Negus, N. C. and Berger, P. J. (1977). Experimental triggering of reproduction in a natural population of *Microtus montanus*. *Science* **196**, 1230–1231. doi:10.1126/science.323977
- Niinemets, U., Kuhn, U., Harley, P. C., Staudt, M., Arneth, A., Cescatti, A., Ciccio, P., Copolovici, L., Geron, C., Guenther, A. et al. (2011). Estimations of isoprenoid emission capacity from enclosure studies: measurements, data processing, quality and standardized measurement protocols. *Biogeosciences* **8**, 2209–2246. doi:10.5194/bg-8-2209-2011
- Nilsson, J.-Å., Källander, H. (2006). Leafing phenology and timing of egg laying in great tits *Parus major* and blue tits *P. caeruleus*. *J. Avian Biol.* **37**, 357–363. doi:10.1111/j.2006.0908-8857.03604.x
- Parmesan, C. (2006). Ecological and evolutionary responses to recent climate change. *Annu. Rev. Ecol. Syst.* **37**, 637–669. doi:10.1146/annurev.ecolsys.37.091305.110100
- Perfito, N., Meddle, S. L., Tramontin, A. D., Sharp, P. J. and Wingfield, J. C. (2005). Seasonal gonadal recrudescence in song sparrows: response to temperature cues. *Gen. Comp. Endocrinol.* **143**, 121–128. doi:10.1016/j.ygcen.2005.03.004
- Réale, D., Reader, S. M., Sol, D., McDougall, P. T. and Dingemanse, N. J. (2007). Integrating animal temperament within ecology and evolution. *Biol. Rev.* **82**, 291–318. doi:10.1111/j.1469-185X.2007.00010.x
- Reparaz, L. B., van Oers, K., Naguib, M., Doutrelant, C., Visser, M. E. and Caro, S. P. (2014). Mate preference of female blue tits varies with experimental photoperiod. *PLoS ONE* **9**, e92527. doi:10.1371/journal.pone.0092527
- Rondoni, G., Ielo, F., Ricci, C. and Conti, E. (2017). Behavioural and physiological responses to prey-related cues reflect higher competitiveness of invasive vs. native ladybirds. *Sci. Rep.* **7**, 3716. doi:10.1038/s41598-017-03471-9
- Röse, U. S. and Tumlinson, J. H. (2004). Volatiles released from cotton plants in response to *Helicoverpa zea* feeding damage on cotton flower buds. *Planta* **218**, 824–832. doi:10.1007/s00425-003-1162-9
- Savoca, M. S. and Nevitt, G. A. (2014). Evidence that dimethyl sulfide facilitates a tritrophic mutualism between marine primary producers and top predators. *Proc. Natl. Acad. Sci. USA* **111**, 4157–4161. doi:10.1073/pnas.1317120111
- Schaper, S. V., Dawson, A., Sharp, P. J., Gienapp, P., Caro, S. P. and Visser, M. E. (2011a). Increasing temperature, not mean temperature, is a cue for avian timing of reproduction. *Am. Nat.* **179**, E55–E69. doi:10.1086/663675
- Schaper, S. V., Rueda, C., Sharp, P. J., Dawson, A. and Visser, M. E. (2011b). Spring phenology does not affect timing of reproduction in the great tit (*Parus major*). *J. Exp. Biol.* **214**, 3664–3671. doi:10.1242/jeb.059543
- Shutt, J. D., Cabello, I. B., Keogan, K., Leech, D. I., Samplonius, J. M., Whittle, L., Burgess, M. D. and Phillimore, A. B. (2019). The environmental predictors of spatio-temporal variation in the breeding phenology of a passerine bird. *Proc. R. Soc. B Biol. Sci.* **286**, 9. doi:10.1098/rspb.2019.0952
- Slagsvold, T. (1976). Annual and geographical variation in the time of breeding of the great tit *Parus major* and the pied flycatcher *Ficedula hypoleuca* in relation to environmental phenology and spring temperature. *Ornis Scandinavica* **7**, 127–145. doi:10.2307/3676183
- Turlings, T. C. J. and Benrey, B. (1998). Effects of plant metabolites on the behavior and development of parasitic wasps. *Ecoscience* **5**, 321–333. doi:10.1080/11956860.1998.11682472
- van Asch, M., Salis, L., Holleman, L. J. M., Van Lith, B. and Visser, M. E. (2013). Evolutionary response of the egg hatching date of a herbivorous insect under climate change. *Nat. Clim. Change* **3**, 244. doi:10.1038/nclimate1717

- van Oers, K., Buchanan, K. L., Thomas, T. E. and Drent, P. J.** (2011). Correlated response to selection of testosterone levels and immunocompetence in lines selected for avian personality. *Anim. Behav.* **81**, 1055-1061. doi:10.1016/j.anbehav.2011.02.014
- van Poecke, R. M. P., Posthumus, M. A. and Dicke, M.** (2001). Herbivore-induced volatile production by *Arabidopsis thaliana* leads to attraction of the parasitoid *Cotesia rubecula*: chemical, behavioral, and gene-expression analysis. *J. Chem. Ecol.* **27**, 1911-1928. doi:10.1023/A:1012213116515
- Verhagen, I., Tomotani, B. M., Gienapp, P. and Visser, M. E.** (2020). Temperature has a causal and plastic effect on timing of breeding in a small songbird. *J. Exp. Biol.* **223**, jeb218784. doi:10.1242/jeb.218784
- Visser, M. E., Silverin, B., Lambrechts, M. M. and Tinbergen, J. M.** (2002). No evidence for tree phenology as a cue for the timing of reproduction in tits *Parus* spp. *Avian Sci.* **2**, 77-86.
- Visser, M. E., Holleman, L. J. M. and Caro, S. P.** (2009). Temperature has a causal effect on avian timing of reproduction. *Proc. R. Soc. B* **276**, 2323-2331. doi:10.1098/rspb.2009.0213
- Visser, M. E., Schaper, S. V., Holleman, L. J. M., Dawson, A., Sharp, P., Gienapp, P. and Caro, S. P.** (2011). Genetic variation in cue sensitivity involved in avian timing of reproduction. *Funct. Ecol.* **25**, 868-877. doi:10.1111/j.1365-2435.2011.01844.x
- Voigt, C., Goymann, W. and Leitner, S.** (2007). Green matters! Growing vegetation stimulates breeding under short-day conditions in wild canaries (*Serinus canaria*). *J. Biol. Rhythms* **22**, 554-557. doi:10.1177/0748730407306928
- Voigt, C., Meiners, T., Ter Maat, A. and Leitner, S.** (2011). Multisensory non-photoperiodic cue advances the onset of seasonal breeding in island canaries (*Serinus canaria*). *J. Biol. Rhythms* **26**, 434-440. doi:10.1177/0748730411414334
- Watts, H. E., Jimenez, D., Pacheco, V. and Vilgalys, T. P.** (2018). Effects of temperature on the timing of breeding and molt transitions in house finches. *J. Exp. Biol.* **221**, jeb185058. doi:10.1242/jeb.185058
- Williams, T. D.** (2008). Individual variation in endocrine systems: moving beyond the 'tyranny of the Golden Mean'. *Philos. Trans. R. Soc. B* **363**, 1687-1698. doi:10.1098/rstb.2007.0003
- Wingfield, J. C. and Kenagy, G. J.** (1991). Natural regulation of reproductive cycles. In *Vertebrate Endocrinology: Fundamentals and Biomedical Implications*, Vol. 4 (part B) (ed. P. K. T. Pawg and M. P. Schreiberman), pp. 181-241. New York: Academic Press Inc.
- Yu, D., Klein, S. A. and Reindl, D. T.** (2001). An evaluation of silica gel for humidity control in display cases. *WAAC Newsletter* **23**, 14-19. <https://cool.culturalheritage.org/waac/wn/wn23/wn23-2/wn23-206.html>
